# Supplementary material
Source: PubMed Central journal article supplement (PMC3406152)
Supplement: AEM.00810-12_zam999103509so1.pdf [file AEM.00810-12_zam999103509so1.pdf]

**TABLE S1.** Effect of threshold similarity utilized for calling OTUs on the analysis of rarified *narG*, *nirK*, *nirS*, and *nosZ* derived from palsa peat soil.

| Gene marker         | Threshold similarity (%) | Soil layer (cm) | α-Diversity                       |                          |                                    |                           |                              |                |                              | β-Diversity    |              |              |              |              |
|---------------------|--------------------------|-----------------|-----------------------------------|--------------------------|------------------------------------|---------------------------|------------------------------|----------------|------------------------------|----------------|--------------|--------------|--------------|--------------|
|                     |                          |                 | No. of OTUs observed <sup>a</sup> | Comparison observed OTUs | No. of OTUs estimated <sup>b</sup> | Comparison estimated OTUs | $H^c$                        | Comparison $H$ | $E^d$                        | Comparison $E$ | $S_s^e$      | $BC_s^f$     | $D_{UU}^g$   | $D_{WU}^h$   |
| <i>narG</i> forward | 67                       | 0 to 20<br>> 20 | 2.89 ± 0.07<br>2.76 ± 0.04        | $P=0.11^i$               | 3.00 ± 0.09<br>2.76 ± 0.04         | $P=0.02^g$                | 0.56 ± 0.003<br>0.81 ± 0.002 | $P<0.001^g$    | 0.40 ± 0.01<br>0.58 ± 0.01   | $P<0.001^g$    | 0.19 ± 0.01  | 0.11 ± 0.001 | 0.34 ± 0.021 | 0.06 ± 0.001 |
|                     | 97                       | 0 to 20<br>> 20 | 88.9 ± 0.50<br>47.0 ± 0.29        | $P<0.001$                | 196 ± 4.4<br>92 ± 2.7              | $P<0.001$                 | 3.29 ± 0.008<br>2.17 ± 0.006 | $P<0.001$      | 0.51 ± 0.001<br>0.39 ± 0.001 | $P<0.001$      | 0.65 ± 0.003 | 0.67 ± 0.001 | 0.61 ± 0.003 | 0.42 ± 0.001 |
| <i>narG</i> reverse | 67                       | 0 to 20<br>> 20 | 1.54 ± 0.05<br>1.00 ± 0.00        | $P<0.001$                | 1.54 ± 0.05<br>1.00 ± 0.00         | $P<0.001$                 | 0.07 ± 0.001<br>0.00 ± 0.000 | $P<0.001$      | 0.01 ± 0.00<br>n.a.          | $P<0.001$      | 0.18 ± 0.02  | 0.00 ± 0.00  | 0.27 ± 0.025 | 0.00 ± 0.000 |
|                     | 97                       | 0 to 20<br>> 20 | 95.6 ± 0.55<br>53.0 ± 0.34        | $P<0.001$                | 219 ± 4.8<br>115.1 ± 3.5           | $P<0.001$                 | 3.12 ± 0.009<br>2.44 ± 0.005 | $P<0.001$      | 0.48 ± 0.001<br>0.43 ± 0.001 | $P<0.001$      | 0.69 ± 0.003 | 0.66 ± 0.001 | 0.61 ± 0.003 | 0.41 ± 0.001 |
| <i>nirK</i>         | 83                       | 0 to 20<br>> 20 | 4.00 ± 0.01<br>7.70 ± 0.04        | $P<0.001$                | 4.00 ± 0.01<br>8.56 ± 0.11         | $P<0.001$                 | 1.50 ± 0.001<br>0.71 ± 0.001 | $P<0.001$      | 0.75 ± 0.001<br>0.24 ± 0.001 | $P<0.001$      | 0.64 ± 0.002 | 0.87 ± 0.001 | 0.61 ± 0.003 | 0.32 ± 0.001 |
|                     | 97                       | 0 to 20<br>> 20 | 26.4 ± 0.19<br>46.1 ± 0.12        | $P<0.001$                | 35.5 ± 1.21<br>66.2 ± 0.72         | $P<0.001$                 | 2.33 ± 0.003<br>1.72 ± 0.001 | $P<0.001$      | 0.49 ± 0.001<br>0.31 ± 0.001 | $P<0.001$      | 0.85 ± 0.001 | 0.87 ± 0.001 | 0.79 ± 0.002 | 0.39 ± 0.001 |
| <i>nirS</i>         | 82                       | 0 to 20<br>> 20 | 4.00 ± 0.01<br>7.97 ± 0.10        | $P<0.001$                | 4.00 ± 0.01<br>8.38 ± 0.16         | $P<0.001$                 | 0.78 ± 0.001<br>2.29 ± 0.015 | $P<0.001$      | 0.39 ± 0.001<br>0.77 ± 0.004 | $P<0.001$      | 0.82 ± 0.004 | 0.92 ± 0.003 | 0.86 ± 0.001 | 0.34 ± 0.001 |
|                     | 97                       | 0 to 20<br>> 20 | 7.00 ± 0.01<br>15.4 ± 0.21        | $P<0.001$                | 7.50 ± 0.01<br>24.6 ± 1.07         | $P<0.001$                 | 1.10 ± 0.001<br>3.09 ± 0.017 | $P<0.001$      | 0.39 ± 0.001<br>0.79 ± 0.003 | $P<0.001$      | 0.97 ± 0.005 | 1.00 ± 0.001 | 0.95 ± 0.001 | 0.40 ± 0.001 |
| <i>nosZ</i> forward | 80                       | 0 to 20<br>> 20 | 4.66 ± 0.05<br>5.96 ± 0.02        | $P<0.001$                | 4.66 ± 0.05<br>5.96 ± 0.02         | $P<0.001$                 | 1.30 ± 0.002<br>1.48 ± 0.001 | $P<0.001$      | 0.59 ± 0.004<br>0.57 ± 0.001 | $P<0.001$      | 0.34 ± 0.004 | 0.07 ± 0.001 | 0.36 ± 0.005 | 0.02 ± 0.001 |
|                     | 97                       | 0 to 20<br>> 20 | 28.3 ± 0.15<br>24.7 ± 0.06        | $P<0.001$                | 35.5 ± 0.6<br>28.8 ± 0.2           | $P<0.001$                 | 2.22 ± 0.004<br>2.37 ± 0.001 | $P<0.001$      | 0.46 ± 0.001<br>0.51 ± 0.001 | $P<0.001$      | 0.55 ± 0.002 | 0.21 ± 0.001 | 0.53 ± 0.002 | 0.04 ± 0.001 |
| <i>nosZ</i> reverse | 80                       | 0 to 20<br>> 20 | 4.00 ± 0.00<br>5.67 ± 0.05        | $P<0.001$                | 4.00 ± 0.00<br>5.68 ± 0.05         | $P<0.001$                 | 1.26 ± 0.002<br>1.45 ± 0.002 | $P<0.001$      | 0.63 ± 0.001<br>0.58 ± 0.003 | $P<0.001$      | 0.17 ± 0.004 | 0.07 ± 0.001 | 0.19 ± 0.003 | 0.02 ± 0.001 |
|                     | 97                       | 0 to 20<br>> 20 | 24.4 ± 0.16<br>24.8 ± 0.15        | $P=0.10$                 | 31.5 ± 0.7<br>32.1 ± 0.9           | $P=0.65$                  | 2.02 ± 0.004<br>2.31 ± 0.003 | $P<0.001$      | 0.44 ± 0.001<br>0.50 ± 0.001 | $P<0.001$      | 0.53 ± 0.002 | 0.20 ± 0.001 | 0.40 ± 0.002 | 0.05 ± 0.001 |

<sup>a</sup> Number of OTUs observed in rarified OTU tables ± standard error.

<sup>b</sup> Chao1 richness estimate of rarified OTUs ± standard error.

<sup>c</sup> Shannon diversity index of rarified OTUs ± standard error.

<sup>d</sup> Species Evenness of rarified OTUs ± standard error.

<sup>e</sup> Sørensen similarity index of rarified OTUs ± standard error.

<sup>f</sup> Bray Curtis similarity index of rarified OTUs ± standard error.

<sup>g</sup> Unweighted Unifrac distance of rarified OTUs ± standard error.

<sup>h</sup> Weighted Unifrac distance of rarified OTUs ± standard error.

<sup>i</sup>  $P$ -values of T-test for pairwise comparisons of values from upper and lower soil layers are given
